# Supplementary material for: Extracting research-quality phenotypes from electronic health records to support precision medicine
Source: Springer Nature journal article supplement (doi:10.1186/s13073-015-0166-y), 2015-04-30

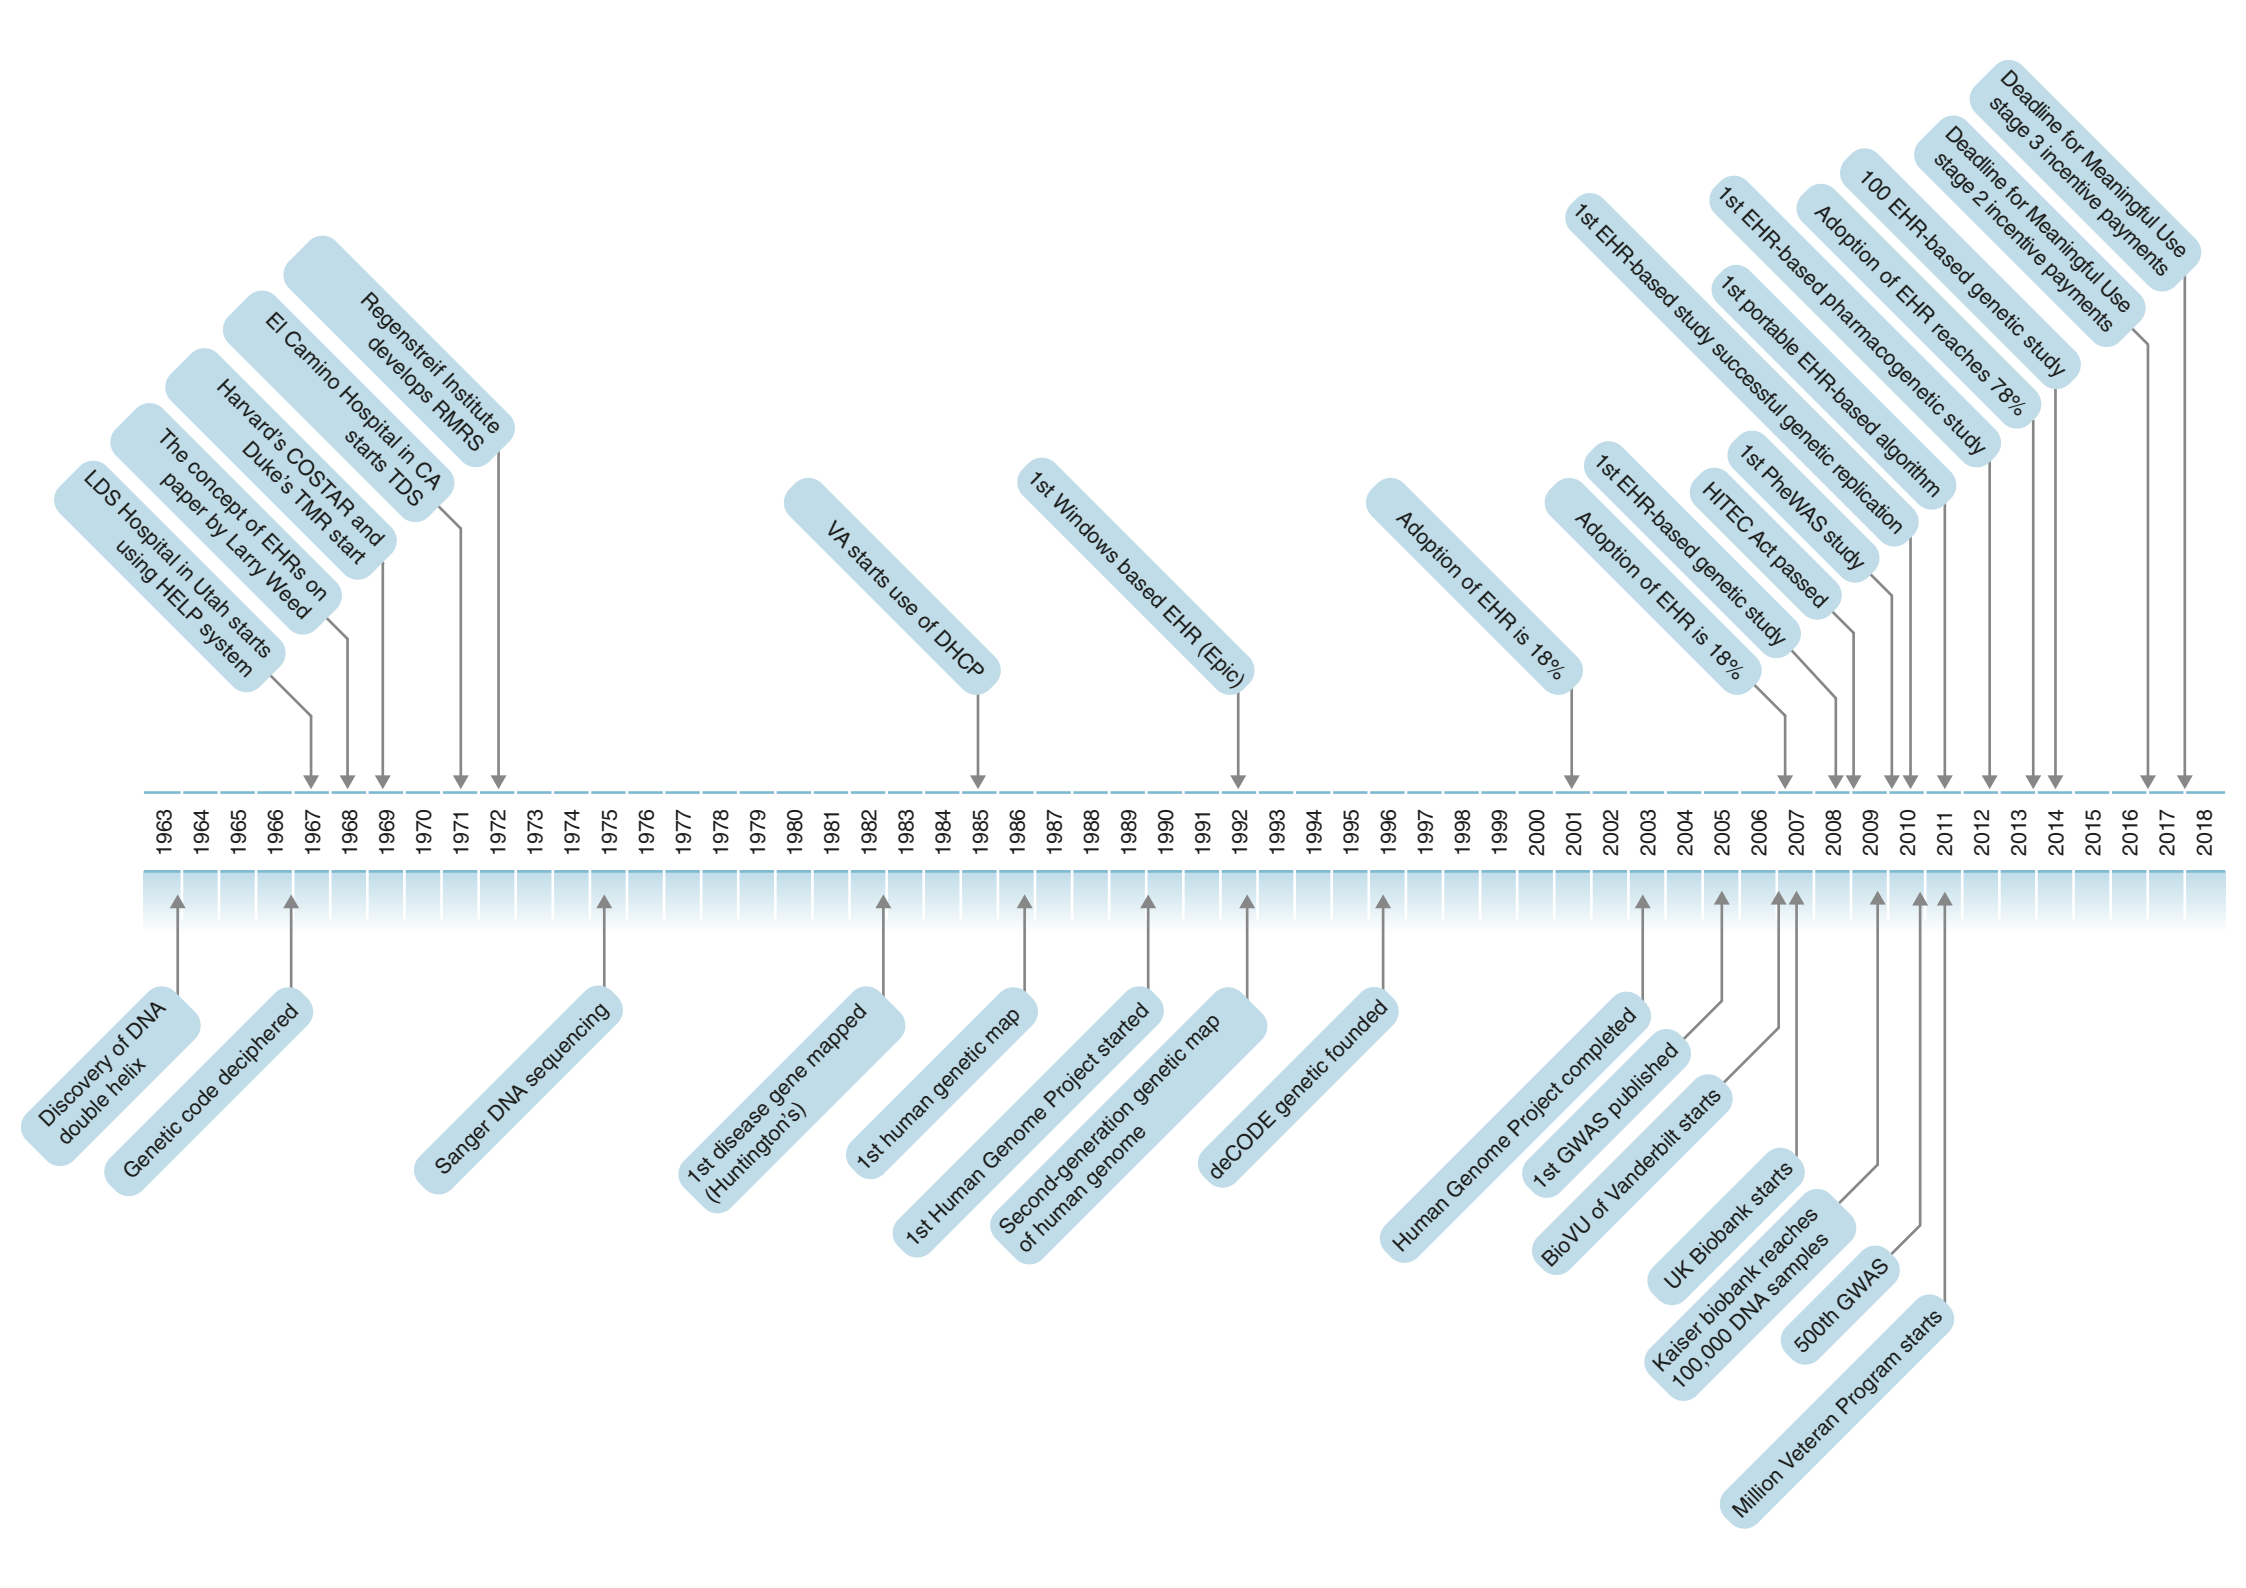

Supplement: 13073_2015_166_MOESM1_ESM.pdf [file 13073_2015_166_MOESM1_ESM.pdf]
